1                   **Network analysis reveals a distinct axis of macrophage activation**  
2                   **in response to conflicting inflammatory cues**

3  
4 Xiaji Liu<sup>1</sup>, Jingyuan Zhang<sup>1</sup>, Angela C. Zeigler<sup>1</sup>, Anders R. Nelson<sup>1</sup>, Merry L. Lindsey<sup>2</sup>,  
5 and Jeffrey J. Saucerman<sup>1\*</sup>

6  
7 1. Department of Biomedical Engineering, University of Virginia, Charlottesville, VA,  
8 USA

9 2. Department of Cellular and Integrative Physiology, University of Nebraska Medical  
10 Center and Research Service, Nebraska-Western Iowa Health Care System, Omaha,  
11 NE 68198, USA.

12  
13 **\*Corresponding author:**

14 Jeffrey J. Saucerman, Ph.D.

15 PO Box 800759

16 Charlottesville, VA 22908-0759

17 jsaucerman@virginia.edu

18  
19 **Running title:** Network model of macrophage crosstalk

20  
21 **Summary sentence**

22 Network modeling of macrophage activation predicts responses to combinations of  
23 cytokines along both the M1-M2 polarization axis and a second axis associated with a  
24 mixed macrophage activation phenotype.

25  
26 **Abstract**

27 Macrophages are subject to a wide range of cytokine and pathogen signals in vivo,  
28 which contribute to differential activation and modulation of inflammation. Understanding  
29 the response to multiple, often conflicting, cues that macrophages experience requires a  
30 network perspective. Here, we integrate data from literature curation and mRNA  
31 expression profiles to develop a large-scale computational model of the macrophage  
32 signaling network. In response to stimulation across all pairs of 9 cytokine inputs, the  
33 model predicted activation along the classic M1-M2 polarization axis but also a second  
34 axis of macrophage activation that distinguishes unstimulated macrophages from a  
35 mixed phenotype induced by conflicting cues. Along this second axis, combinations of  
36 conflicting stimuli, interleukin 4 (IL4) with lipopolysaccharide (LPS), interferon- $\gamma$  (IFN $\gamma$ ),  
37 IFN $\beta$ , or tumor necrosis factor- $\alpha$  (TNF $\alpha$ ), produced mutual inhibition of several signaling  
38 pathways, e.g. nuclear factor  $\kappa$ B (NF $\kappa$ B) and signal transducer and activator of  
39 transcription 6 (STAT6), but also mutual activation of the phosphoinositide 3-kinases  
40 (PI3K) signaling module. In response to combined IFN $\gamma$  and IL4, the model predicted  
41 genes whose expression was mutually inhibited, e.g. inducible nitric oxide synthase  
42 (iNOS) and arginase 1 (Arg1), or mutually enhanced, e.g. IL4 receptor- $\alpha$  (IL4R $\alpha$ ) and  
43 suppressor of cytokine signaling 1 (SOCS1), which was validated by independent  
44 experimental data. Knockdown simulations further predicted network mechanisms  
45 underlying functional crosstalk, such as mutual STAT3/STAT6-mediated enhancement  
46 of IL4R $\alpha$  expression. In summary, the computational model predicts that network

47 crosstalk mediates a broadened spectrum of macrophage activation in response to  
48 mixed pro- and anti-inflammatory cytokine cues, making it useful for modeling in vivo  
49 scenarios.

50

## 51 **Introduction**

52 Macrophages are central mediators of inflammation across a diverse range of protective  
53 or pathogenic processes including antimicrobial defense, anti-tumor immune responses,  
54 allergy and asthma, wound healing, and autoimmunity.[1]–[6] Tumor-associated  
55 macrophages generally exhibit an anti-inflammatory phenotype in response to hypoxic  
56 tumor microenvironment signals.[5] In rheumatoid arthritis, both pro- and anti-  
57 inflammatory cytokines stimulate macrophages to control inducible nitric oxide synthase  
58 (iNOS) expression and nitric oxide production, which is implicated in inflammation,  
59 angiogenesis, and tissue reconstruction.[6] After myocardial infarction, the macrophage  
60 population consists of subtypes that regulate the early pro-inflammatory and later anti-  
61 inflammatory reparative phases of infarct remodeling. Pro-inflammatory macrophages  
62 mediate the release of pro-inflammatory cytokines, whereas anti-inflammatory  
63 macrophages mainly participate in wound-healing.[7]–[11]

64 Macrophage infiltration into tissue and activation are coordinated by a variety of  
65 chemokines and cytokines. These environmental cues induce different macrophage  
66 phenotypes, characterized by distinct gene expression patterns and cell functions.  
67 Historically, macrophages in vitro have been classified into the classically (pro-  
68 inflammatory, M1) activated and the alternatively (anti-inflammatory, M2) activated  
69 phenotypes, each associated with specific markers. Lipopolysaccharide (LPS) and  
70 interferon- $\gamma$  (IFN $\gamma$ ) are the prototypical stimuli for M1-type activation, and interleukin(IL)-  
71 4 is a prototypical M2-type stimulus.[12], [13] However, a number of studies have shown  
72 more diverse, stimulus-dependent macrophage phenotypes.[1], [4], [14]–[17] *In vivo*  
73 studies further indicate that macrophages respond to more complex, tissue-specific  
74 combinations of signaling factors than typically studied in vitro.[18], [19] Several recent  
75 reviews have noted that macrophage activation, orchestrated by complex  
76 spatiotemporally signaling cues, extends well beyond the linear M1/M2 spectrum and  
77 requires reassessment of current conceptual models.[20]–[22]

78 Developing more accurate conceptual models will require comprehensive  
79 assessments of macrophage phenotypes and systems biology frameworks that  
80 mechanistically link cues to phenotype. Advances in transcriptomics have provided  
81 genome-scale signatures of macrophage responses that extend beyond the limited  
82 marker panels previously considered. Omics studies have been critical in defining the  
83 complexity of macrophage responses that depend on cell source, timepoints of  
84 evaluation, and stimuli applied.[14], [23], [24] Network models are needed to  
85 mechanistically explain how complex cytokine inputs produce such signatures. [25],  
86 [21], [26] Large-scale network models have previously revealed key signaling properties  
87 of a number of mammalian cell types, including cardiac myocytes, fibroblasts, and T  
88 cells.[27]–[29]

89 To address this challenge, here we developed a large-scale, logic-based  
90 differential equation (LDE) computational model of macrophage activation. We refined  
91 and validated the model semi-quantitatively using RNA-Seq data from LPS+IFN $\gamma$  or IL4-  
92 stimulated peritoneal macrophages. To examine how this network resolves conflicting

93 cytokine cues, as often occurs in vivo, we simulated all pairwise combinations of 9  
94 cytokine inputs. Predictions of gene expression in response to combined IFN $\gamma$  and IL4  
95 treatment were validated against an independent RNA-Seq dataset, and comprehensive  
96 knockdown simulations were used to identify underlying crosstalk mechanisms.

97

## 98 **Results**

99 *Developing a large-scale, logic-based differential equation model of the macrophage*  
100 *activation signaling network*

101 We performed a manual literature curation of the macrophage activation signaling  
102 network, integrating signaling pathways from review articles, original research articles,  
103 and a previous computational model (see **Methods**). [1], [30]–[32] This curated signaling  
104 network incorporated 9 cytokine inputs, including the classic M1-inducing LPS and  
105 IFN $\gamma$ , M2-inducing IL4, as well as 7 other cytokines important in macrophage activation:  
106 IFN $\beta$ , IL1, IL6, IL10, IL12 and tumor necrosis factor- $\alpha$  (TNF $\alpha$ ). [33], [13], [30], [15] A total  
107 of 39 mRNAs were selected as model outputs based on their association with  
108 macrophage polarization in previous studies and their differential expression in murine  
109 peritoneal macrophages stimulated by either LPS+IFN $\gamma$  or IL4 for 4h. [34]  
110 Transcriptional feedback was incorporated for expression of I $\kappa$ B $\alpha$ , IL4R $\alpha$  and autocrine  
111 cytokines IFN $\beta$ , IFN $\gamma$ , IL1, IL6, IL10, IL12, and TNF $\alpha$ . Overall, this signaling network  
112 included 139 nodes (mRNA, proteins, and small molecules) connected by 200 reactions  
113 (**Figure 1**). Using this network structure, a logic-based differential equation (LDE) model  
114 of this signaling network was automatically generated as previously described (see  
115 **Methods**). [35]–[37] A full description of model structure, parameters, and supporting  
116 literature is provided in **Supplementary Table S1**.

117

118 *Predicting signaling and gene expression dynamics in response to pro- and anti-*  
119 *inflammatory stimuli*

120 The model was used to predict the dynamics of macrophage gene expression in  
121 response to stimulation by either pro-inflammatory LPS+IFN $\gamma$  or anti-inflammatory IL4  
122 (**Figure 2A**). Consistent with previous studies, genes used as pro-inflammatory  
123 phenotype markers such as IL1 and iNOS mRNAs were specifically induced by  
124 LPS+IFN $\gamma$  stimulation, while anti-inflammatory markers such as arginase 1 (Arg1)  
125 mRNA were specifically induced by IL4 stimulation. IL1, I $\kappa$ B $\alpha$ , and matrix  
126 metalloproteinase 3/7/9 (MMP3/7/9) mRNAs were predicted to exhibit adaptive  
127 expression due to negative feedback regulation. Suppressor of cytokine signaling 1  
128 (SOCS1) expression was predicted to increase under both conditions, but somewhat  
129 more strongly with LPS+IFN $\gamma$  (**Figure 2B**). Network-wide responses to LPS+IFN $\gamma$  and  
130 IL4 stimulation are visualized in **Supplementary Figure S1**.

131 Model predictions of mRNA expression were compared to experimental  
132 transcriptome responses of peritoneal macrophages stimulated with LPS+IFN $\gamma$  or IL4  
133 for 4 h (**Figure 2C**; see **Supplementary Figure S2** for differential expression analysis).  
134 Semi-quantitative comparisons between the model and experimental measurements  
135 were performed by root-mean squared (RMS) normalization of log<sub>2</sub> fold changes in  
136 gene expression. For both LPS+IFN $\gamma$  and IL4 stimulated conditions, we observed high  
137 consistency between the predicted model and experimentally measured expression  
138 profiles. In the LPS+IFN $\gamma$  stimulated macrophages, 27 out of 29 genes were semi-

139 quantitatively consistent (absolute difference in RMS-normalized fold change less than  
140 0.4). The two quantitatively inconsistent genes, C-C motif chemokine ligand 17 (CCL17)  
141 and peroxisome proliferator-activated receptor- $\gamma$  (PPAR $\gamma$ ), both qualitatively decreased  
142 in the RNA-Seq data and model predictions. In IL4-stimulated macrophages, 26 out of  
143 29 genes were semi-quantitatively consistent. Two of the three inconsistent genes,  
144 CCL17 and SMAD7, both qualitatively increased in the RNA-Seq data and model  
145 prediction. IL4 Receptor- $\alpha$  (IL4R $\alpha$ ) was predicted to be increase yet was not significantly  
146 differentially expressed in the RNA-Seq data. Overall the model exhibited 91.4% (53 of  
147 58) semi-quantitative match and another 6.9% (4 of 58) trend match with RNA-Seq  
148 data, for a total match of 98.3% (57 of 58).

149 To identify the key drivers of differential macrophage responses to LPS+IFN $\gamma$   
150 and IL4 input-dependent differential responses, we simulated network-wide node  
151 knockdowns. As shown in **Supplementary Figure S3**, the network response to  
152 knockdowns differed considerably between LPS+IFN $\gamma$  and IL4 conditions. Network  
153 influence of a given node was quantified by summing the absolute change in all network  
154 nodes when that node was knocked down (columns in **Supplementary Figure S3**). The  
155 most influential nodes in LPS+IFN $\gamma$  -treated macrophages differed considerably from  
156 the most highly influential nodes with IL4 treatment (**Figure 3A**). Node sensitivity was  
157 quantified by summing the absolute change in that node across all node knockdowns  
158 (rows in **Supplementary Figure S3**).

159 Based on network-wide knockdown simulations, the top 10 most influential nodes  
160 and top 10 most sensitive nodes were ranked for both the LPS+IFN $\gamma$  and IL4 stimulated  
161 conditions. Under LPS+IFN $\gamma$  stimulation, the most influential nodes are the LPS-toll like  
162 receptor 4 (TLR4)-myeloid differentiation 88 (MyD88)- TNF receptor associated factor 6  
163 (TRAF6) signaling axis, phosphoinositide 3-kinases (PI3K)/AKT, and pro-inflammatory  
164 transcriptional factors signal transducer and activator of transcription 1 (STAT1) and  
165 nuclear factor  $\kappa$ B (NF $\kappa$ B) (**Figure 3B, left panel**). The nodes most sensitive to  
166 knockdowns under LPS+IFN $\gamma$  stimulation were induced by mitogen-activated protein  
167 kinases (MAPKs) and IL1 autocrine signaling, suggesting a highly interactive and  
168 feedback-dependent network. In contrast, with IL4 stimulation the most influential nodes  
169 were associated with the IL4-STAT6 signaling axis except I $\kappa$ B $\alpha$  (which was negatively  
170 regulated by the IL4-STAT6 pathway) and SOCS1, which negatively fed back to STAT6  
171 activation. The most sensitive nodes under IL4 stimulation were all STAT6-induced,  
172 consistent with the dominant signaling through the IL4-STAT6 signaling axis (**Figure**  
173 **3B, right panel**).

174  
175 *Distinct macrophage phenotypes predicted in response to stimuli combinations*  
176 During inflammation, macrophages are subjected to multiple, sometimes conflicting  
177 cues. Responses to combinations of stimuli may reveal the crosstalk mechanisms that  
178 underlie cellular decision making. To this end, we simulated the 9 single input stimuli, 36  
179 pairwise combinations, and negative control conditions. Network responses to cytokine  
180 combinations clustered into 6 phenotypes, which were largely determined by a  
181 dominating role of LPS, TNF $\alpha$ /IFN $\gamma$ /IFN $\beta$ , IL1, or IL4 (**Figure 4A**, conditions listed in  
182 **Table 1**). Signaling modules distinctly induced by these stimuli are visualized in  
183 **Supplementary Figure S4**.

184 Principal component analysis separated M1-like phenotypes stimulated by pro-  
185 inflammatory cytokines from the M2-like phenotype stimulated by anti-inflammatory  
186 cytokines along principal component 1 (PC1) (**Figure 4B**). Principal component 2 (PC2)  
187 provided further distinction among macrophage phenotypes beyond the well-established  
188 M1-M2 axis. LPS and IFN $\gamma$  are both considered classic M1-inducing stimuli [1], [31],  
189 and they both strongly stimulated the NF $\kappa$ B module. However, LPS was distinguished  
190 along PC2 by stronger activation of MAPKs and STAT1 modules and IL1 mRNA  
191 expression, while IFN $\gamma$  stimulated glycogen synthase kinase 3 (GSK3) (**Figure 4C**). IL4-  
192 and IL10-dominated combinations were both located in the positive PC1 direction,  
193 associated with a M2-like phenotype. However, PC2 distinguished their distinct  
194 regulation of STAT6 and STAT3 modules (**Figure 4C**), which is consistent with  
195 previously reported distinctions between M2-like phenotypes induced by IL4 and  
196 IL10.[38], [39] IL10-treated macrophages are generally considered as a deactivated M2  
197 phenotype, consistent with the IL10-induced phenotypes clustered together with the  
198 control condition.

199 Co-stimulation of LPS, TNF $\alpha$ , IFN $\gamma$ , or IFN $\beta$  with IL4 produced a mixed  
200 phenotype distinct from that observed with any individual stimulus (**Figure 4B**). As  
201 expected, combinations of these pro- and anti-inflammatory stimuli were mutually  
202 inhibiting along the M1-M2 axis. Surprisingly, these combinations were mutually  
203 activating along the PC2 dimension. PCA did not resolve unique markers of the mixed  
204 phenotype, indicating that closer examination of particular conflicting stimuli was  
205 needed to identify the drivers of mutual inhibition and activation. Compared to analysis  
206 of single treatments alone (**Supplementary Figure S5**), combination treatments  
207 decreased the variance explained by PC1 from 61% to 55% and increased the variance  
208 explained by PC2 from 14% to 17%. Together these results indicate an important  
209 dimension to macrophage activation beyond the classic M1-M2 polarization paradigm.

210  
211 *Antagonistic stimulus combinations elicited both antagonistic and mutualistic responses*  
212 *in different signaling modules.*

213 To identify network mechanisms that may contribute to cross-talk between conflicting  
214 cues, we focused on IFN $\gamma$  with IL4, as this pair often co-exists in vivo and has been  
215 studied experimentally.[40] Signaling module activation was quantified by the sum of the  
216 node activities within each module, as identified in the hierarchical clustering analysis.  
217 Addition of a conflicting stimulus decreased activity of IFN $\gamma$  -induced MAPKs, NF $\kappa$ B,  
218 and STAT1 modules and IL4-induced STAT6 modules, demonstrating mutual inhibition  
219 of these modules (**Figure 5A**). In contrast, STAT3 and PI3K modules were further  
220 activated by co-stimulation with the pro- and anti-inflammatory inputs, consistent with  
221 our observation of a unique mixed phenotype.

222 We further examined potential cross-talk between IFN $\gamma$  and IL4 on gene  
223 expression, which was validated against independent published RNA-Seq data of  
224 murine bone marrow-derived macrophages treated with IFN $\gamma$  and IL4 combinations for  
225 4 h (**Figure 5B**).[40] The difference in RMS-normalized change in gene expression  
226 between single cytokine (IFN $\gamma$  or IL4) and combined IFN $\gamma$ +IL4 conditions was computed  
227 for both model and experiments. Genes were grouped as IFN $\gamma$ -, IL4-, or mutually-  
228 induced based on the RNA-Seq responses. The model correctly predicted nine IFN $\gamma$ -  
229 induced genes suppressed by co-stimulation with IL4 (TNF $\alpha$ , IL18, IKK $\alpha$ , IL15, CXCL10,

230 IRF1, SOCS3, iNOS, ICAM1). One exception was CCL5 mRNA, which was not  
231 predicted to be differentially regulated by either IFN $\gamma$  or IL4. The model also correctly  
232 predicted IFN $\gamma$  -mediated inhibition of four IL4-induced genes (KLF4, Fizz1, Myc, Arg1).  
233 In addition to these mutually inhibitive effects, the model correctly predicted mutual  
234 induction of SOCS1 and IL4R $\alpha$  gene expression by IFN $\gamma$ +IL4 co-stimulation (predicted  
235 kinetics shown in **Figure 5C**).

236 Responses to IFN $\gamma$ +IL4 co-stimulation were visualized to identify network  
237 mechanisms contributing to mutual inhibition or activation (**Supplementary Figure S6**).  
238 SOCS1 mRNA was induced by IFN $\gamma$ -stimulated interferon regulatory factor 1 (IRF1) and  
239 IL4-stimulated STAT6. Mutual induction of IL4R $\alpha$  mRNA was mediated by IFN $\gamma$ -  
240 stimulated STAT3 and IL4-stimulated STAT6. Mutual activation of PI3K/AKT was  
241 mediated by IFN $\gamma$ -stimulated IL10 and TNF $\alpha$  as well as IL4-stimulated growth factor  
242 receptor-bound protein 2 (GRB2). Under combined IFN $\gamma$ +IL4, network-wide  
243 knockdowns demonstrate that mutually activated PI3K and SOCS1 became highly  
244 influential in suppressing pro-inflammatory and anti-inflammatory genes, respectively  
245 (**Figure 5D** and **Supplementary Figure S7**).

246

## 247 Discussion

248 Here, we developed a computational model that provides a quantitative framework with  
249 which to understand how macrophages integrate and respond to multiple, often  
250 conflicting cues. The model was validated against transcriptome measurements from  
251 pro- and anti-inflammatory cues (LPS+IFN $\gamma$  and IL4, respectively), as well as mixed  
252 IFN $\gamma$  + IL4 stimulation. In response to combined treatments, macrophages were  
253 predicted to respond not only along the classic M1-M2 polarization axis but also along a  
254 second, orthogonal dimension differentiating inactive (M0) macrophages from  
255 macrophages that are activated by mixed cues. The model predicted key network  
256 mechanisms that mediate mutual inhibition among M1 and M2-associated cues, which  
257 include predicted mutual activation of the PI3K/STAT3 signaling module and enhanced  
258 gene expression of SOCS1 mRNA and IL4R $\alpha$ . Overall, this study illustrates how  
259 systems analysis of responses to combined stimuli can reveal network principles that  
260 underlie cellular decision making.

261 The classic M1-M2 paradigm distinguishes between pro- and anti-inflammatory  
262 macrophages through differential expression of phenotype markers (e.g. IL1, IL6, iNOS,  
263 TNF $\alpha$  for M1; (Arg1, found in inflammatory zone 1 (Fizz1), PPAR $\gamma$  for M2).[1], [3], [31] *In*  
264 *vitro* studies frequently use LPS, IFN $\gamma$ , or LPS+IFN $\gamma$  treatment to induce the M1-like  
265 phenotype and IL4 or IL10 to induce the M2-like phenotype in mouse, although each  
266 stimulus yields a somewhat different activation state. Furthermore, these simplified  
267 stimulation conditions do not replicate the dynamic multi-factorial stimuli macrophages  
268 experience *in vivo*. [1], [2], [20], [21] The signaling network mediating macrophage  
269 activation is highly complex, making comprehensive perturbations of cytokine and  
270 intracellular perturbations experimentally intractable. [15], [40], [41]

271 Model predictions of response to classic M1/M2 polarization stimuli LPS+IFN $\gamma$  or  
272 IL4 were largely consistent with RNA sequencing data from peritoneal macrophages  
273 and predicted distinctly influential signaling nodes under these conditions. In response  
274 to 36 stimulus pairs, the macrophage network model responded not only along the  
275 classic M1-M2 polarization axis but also along a second axis that further differentiated

276 among macrophage phenotypes (**Figure 6**). Along this new dimension, antagonistic  
277 combinations of IL4 and IFN $\gamma$  or other pro-inflammatory stimuli (LPS induced a mixed  
278 phenotype distinct from either inactive or M1/M2 polarized macrophages. Many classic  
279 M1 and M2 markers were mutually inhibited, yet the PI3K signaling module and SOCS1  
280 and IL4R $\alpha$  mRNAs (in the STAT3 module) were mutually activated. Knockdown  
281 simulations predicted that SOCS1 and PI3K were not only responsive but also helped to  
282 mediate the mutual inhibition characteristic of the mixed phenotype.

283 Macrophage phenotypes are typically assessed based on markers of mRNA or  
284 protein abundance.[1], [3], [31] Here, modeling of dynamic post-translational regulation  
285 of signaling increased the ability to resolve distinct macrophage phenotypes, particularly  
286 in response to antagonistic cytokine combinations and at early timepoints. PI3K, AKT  
287 and GSK3 activities were among the strongest contributors to the mixed phenotype  
288 activation axis orthogonal to the M1-M2 polarization axis. Simulated knockdown of PI3K  
289 and AKTt were also highly influential on macrophage network state with combined IFN $\gamma$   
290 + IL4 stimulation. Indeed, PI3K/AKT signaling has been described as a converging  
291 point for macrophage activation in response to multiple inflammatory stimuli, with  
292 distinct roles depending on the stimulus.[42] Further, signaling dynamics aided  
293 understanding of the mechanisms by which mRNA markers of macrophage phenotype  
294 were mutually inhibited or stimulated.

295 Macrophage activation has previously been modeled using alternative modeling  
296 formalisms and differing scope. A previous Boolean model of macrophage polarization  
297 was developed and specifically refined based on data from bone marrow-derived  
298 macrophages treated with LPS or IL4 with IL13 [32]. For the 10 genes in common  
299 between their model and ours, a logic-based differential equation version of the Boolean  
300 model also predicts gene expression in response to LPS or IL4 that is mostly consistent  
301 with the RNA-Seq data from peritoneal macrophages used in our analysis  
302 (**Supplementary Figure S8**). The model developed here incorporates additional  
303 cytokine inputs (IFN $\gamma$ , IL1, IL6, IL12, and TNF $\alpha$ ), cross-talk mechanisms, and genes that  
304 were important for analysis of combined stimuli. The logic-based differential equation  
305 framework allowed prediction of continuous dynamics and levels of all nodes in the  
306 network, allowing semi-quantitative comparisons of perturbation responses,  
307 experimental validation, and future analysis of dynamically varying inputs. While we  
308 focused analysis towards early changes in signaling and transcription, models focusing  
309 on downstream kinetics of gene regulation have shown an important role for regulation  
310 of mRNA stability.[43] Future model revisions incorporating mRNA stability,[43]  
311 microRNAs,[32] and chromatin modifications[40] may provide further insight into the  
312 feedbacks guiding macrophage activation dynamics.

313 In conclusion, the macrophage network model developed here provides a  
314 framework for network-based understanding of how macrophages respond to complex  
315 stimuli. Integrated network analyses and experimental studies in the context of mixed  
316 stimuli are needed to better characterize and understand the spectrum of macrophage  
317 phenotypes in physiologic and pathologic settings.

318  
319

## 320 **Materials and Methods**

### 321 *Model development*

322 An initial macrophage signaling network was constructed based on literature search in  
323 PubMed, identifying review articles and original articles using the search terms  
324 “macrophage polarization”, “macrophage activation”, “computational modeling”, and  
325 “peritoneal macrophages”. [1], [30]–[32] The signaling network was then extended to  
326 include additional established macrophage activation markers that were differentially  
327 expressed in peritoneal macrophages from wild type (WT) C57/BL6J mice treated with  
328 either 1  $\mu\text{g/ml}$  LPS and 20 ng/ml IFN $\gamma$  or 20 ng/ml IL4 for 4h (see *RNA-seq analysis*,  
329 below).

330 Differences between initial model predictions and experimental measurements  
331 indicated an important role of crosstalk between pro- and anti-inflammatory stimuli. This  
332 motivated further model extension through focused literature search on 1) autocrine  
333 loops identified with keywords such as “macrophage signaling pathway” IFN $\beta$ , IL10, or  
334 IL12; [44]–[49] 2) inclusion of feedback loops reported for SOCS and GSK3; [50], [51, p.  
335 1], [52, p. 3], [53], [54] and 3) the addition of key nodes such as PI3K and cAMP  
336 response element-binding protein (CREB). [15], [30], [48], [55] Autocrine loop candidates  
337 were first identified by reviewing the significantly induced cytokines in the LPS+IFN $\gamma$   
338 and IL4 stimulated macrophages, indicating roles for the IL12-STAT4 and the IL10-  
339 STAT3 signaling axes. The core feedback nodes including SOCS1, SOCS3, GSK3  
340 were examined next and added. Additional signaling modules reported as key cross-  
341 talking nodes of multiple pathways such as PI3K and CREB were also added into the  
342 network. The finalized macrophage signaling network model includes 9 cytokines critical  
343 in macrophage polarization, LPS, IFN $\gamma$ , IFN $\beta$ , IL1, IL4, IL6, IL10, IL12, and TNF $\alpha$ . The  
344 model consists of 139 nodes (mRNA, proteins, and small molecules) and 200 reactions.

345 The signaling network structure was automatically translated into a logic-based  
346 differential equation model as previously described [27], [36], [37], [56] using open  
347 source Netflux software (<https://github.com/saucermanlab/Netflux>). The activity of each  
348 node was modeled using ordinary differential equations with steady state properties  
349 determined by normalized Hill activation or inhibition functions with default parameters  
350 and continuous AND/OR logic gating [56]. Default reaction parameters include reaction  
351 weight (1), Hill coefficient (1.4), and EC50 (0.5). Default node parameters include yinit  
352 (0) and ymax (1). [56] The node parameter  $\tau$  (time constant) was scaled according to the  
353 type of node: 6 min for signaling post-translational modifications, 30 min for mRNA  
354 expression, and 1 h for protein expression based on previous macrophage-specific  
355 studies. [43], [57]–[60] Reactions weights involving protein translation, or with multiple  
356 inputs were set to 0.5 to avoid basal saturation. The baseline level of input was defined  
357 as 5% activity for all inputs (weight = 0.05). Where specified, simulations of particular  
358 cytokine stimuli (LPS+IFN $\gamma$  or IL4) were performed by increasing the weights of  
359 corresponding input reactions from 5% to 70% (weight = 0.7). The model was simulated  
360 in MATLAB v2015b using the adaptive time step solver ODE15S.

361

### 362 *RNA-seq analysis and semi-quantitative model validation*

363 All animal procedures were approved by the Institutional Animal Care and Use  
364 Committee at the University of Mississippi Medical Center and were conducted in  
365 accordance with the Guide for the Care and Use of Laboratory Animals published by the



366 United States National Institutes of Health (Eighth edition; revised 2011). Peritoneal  
367 macrophages were isolated from adult (3-6 month old) C57BL/6J mice (n=4) as  
368 previously described.[61], [62] Cells were plated at  $1.5 \times 10^6$  cells/well, incubated  
369 overnight at 37°C, and then washed with fresh media. Macrophages were assigned to  
370 one of three treatment groups: 1) stimulated with 1 µg/mL LPS (Sigma, L2880) and 20  
371 ng/mL IFN $\gamma$  (R&D, 485-MI) for 4 h; 2) stimulated with 20 ng/mL IL4 (R&D, 404-ML) for 4  
372 h; or 3) untreated for 4 h, serving as the negative control.

373 Transcriptome measurements and analyses were performed as previously  
374 described [63], [64]. RNA was extracted using the Pure Link RNA Mini Kit (Ambion,  
375 Foster City, CA) in accordance with manufacturer instructions. cDNA libraries were  
376 assembled using the TruSeq Total Stranded RNA with RiboZero Kit (Ambion), set-A,  
377 quantified using the Qubit System (Invitrogen, Carlsbad, CA). cDNA library size and  
378 quality were determined with the Experion DNA 1K Chip (Bio-Rad, Hercules, CA). cDNA  
379 libraries were sequenced using the NextSeq 500 High Output Kit (300 cycles, paired  
380 end 100 bp) on the Illumina NextSeq 500 platform (Illumina, San Diego, CA).  
381 Sequenced reads (length = 30–50; Cloud Computing Platform), and Fastq file  
382 sequences were aligned to the reference genome USCS-GRCm38/mm10 using the  
383 STAR aligner with the RNA-Seq Alignment Application [65]. RNAseq count matrices  
384 were analyzed for differential mRNA expression compared to the untreated group  
385 (adjusted p-value < 0.05) using the R ‘DESeq2’ package [66]. IL4-treated and LPS+  
386 IFN $\gamma$ -treated groups were each separately compared to the untreated group. Gene set  
387 enrichment analysis was performed with Reactome2016 pathways in EnrichR, which  
388 uses Fisher’s exact test to compute a combined score as  $c = \ln(\text{p-value}) * (\text{z-score})$  [67].  
389 For heatmap visualization, normalized counts output from DESeq2 were normalized by  
390  $\log_{10}(\text{counts per million})$ . All statistical analysis was performed using R version 3.5.1  
391 and RStudio 1.0.143.

392 For comparison to model predictions, experimentally measured log<sub>2</sub> fold  
393 changes of mRNA compared to negative control were normalized by the root mean  
394 square (RMS) between treatment groups. Likewise, model-predicted log<sub>2</sub> fold changes  
395 in mRNA compared to negative control (baseline inputs 5%) were normalized by the  
396 RMS between treatment groups. Genes were classified as semi-quantitatively  
397 consistent if the absolute difference between model and experimentally measured RMS-  
398 normalized log<sub>2</sub> fold change was smaller than 0.4 (20% of the  $\pm 1$  range).

399 Published RNA-Seq data of murine bone marrow-derived macrophage (BMDMs)  
400 treated with IFN $\gamma$ , IL4, IFN $\gamma$ +IL4, or negative control for 4 h [40] were obtained from  
401 Gene Expression Omnibus with the *GEOquery* package in R (GSE84520). *DESeq2* [66]  
402 was applied to identify differentially expressed genes (adjusted p-value < 0.05). These  
403 data were used as a second validation of IL4 predictions, as well as to validate  
404 predictions of IFN $\gamma$  and combined IFN $\gamma$ +IL4. The difference in RMS-normalized change  
405 in gene expression between single cytokine (IFN $\gamma$  or IL4) vs. combined IFN $\gamma$ +IL4  
406 conditions was computed for both model and experiments.

#### 407 408 *Sensitivity analysis*

409 Comprehensive single-knockdowns were simulated to identify the functional influence of  
410 each node in a given experimental condition.[37] Complete knockdown was simulated  
411 by setting  $y_{\max} = 0$  for that node. Change in activity was calculated as the difference in

412 an individual node activity with and without knockdown in response to the specified  
413 stimulus at 4 h. The sensitivity of a node in a given condition was quantified by summing  
414 the absolute activity changes for that node across all node knockdowns (e.g. the  
415 corresponding row of **Supplementary Figure 3**). The influence of a node in a given  
416 condition was quantified by summing the absolute activity changes of all nodes in  
417 response to that knockdown of that node (e.g. the corresponding column of  
418 **Supplementary Figure 3**).

419

#### 420 *Combined stimuli screening*

421 Network responses to the 9 single inputs, 36 pairwise combinations, and control  
422 conditions were hierarchically-clustered to identify macrophage phenotypes and  
423 signaling modules. Phenotypes were identified by clustering across conditions (rows)  
424 using the Ward method, focusing on the variance between different treatment  
425 responses. Signaling modules were identified by clustering across nodes (columns)  
426 using the complete linkage method, which focuses on the associations among the  
427 different signaling nodes. Module activities were calculated as the sum of node activities  
428 within each module. Principal component analysis (PCA) and variable contribution  
429 analysis was performed using the FactoMineR package in R.

430

#### 431 **Authorship**

432 Conceptualization: JJS, ML; Investigation: XL, JZ, ACZ; Data curation- Formal analysis:  
433 ARN; Writing- original draft: XL, JZ; Writing- editing and revision: XL, ARN, MLL, JJS.

434

#### 435 **Acknowledgments**

436 This study was supported by grants from the National Institutes of Health (HL137755,  
437 HL127944, HL075360, HL129823, and HL137319), the Biomedical Laboratory  
438 Research and Development Service of the Veterans Affairs Office of Research and  
439 Development under Award Number 5I01BX000505, and the National Science  
440 Foundation (1252854).

441

#### 442 **Conflicts-of-Interest Disclosure**

443 The authors declare no conflict of interest.

444

#### 445 **References**

446

- 447 [1] A. Sica and A. Mantovani, "Macrophage plasticity and polarization: in vivo veritas," *J.*  
448 *Clin. Invest.*, vol. 122, no. 3, pp. 787–795, Mar. 2012.
- 449 [2] F. Ginhoux, J. L. Schultze, P. J. Murray, J. Ochando, and S. K. Biswas, "New insights into  
450 the multidimensional concept of macrophage ontogeny, activation and function," *Nat.*  
451 *Immunol.*, vol. 17, no. 1, pp. 34–40, Jan. 2016.
- 452 [3] P. J. Murray and T. A. Wynn, "Protective and pathogenic functions of macrophage  
453 subsets," *Nat. Rev. Immunol.*, vol. 11, no. 11, pp. 723–737, Oct. 2011.
- 454 [4] C. J. Ferrante and S. J. Leibovich, "Regulation of Macrophage Polarization and Wound  
455 Healing," *Adv. Wound Care*, vol. 1, no. 1, pp. 10–16, Feb. 2012.

- 456 [5] S. K. Jeong *et al.*, “Tumor associated macrophages provide the survival resistance of tumor  
457 cells to hypoxic microenvironmental condition through IL-6 receptor-mediated signals,”  
458 *Immunobiology*, vol. 222, no. 1, pp. 55–65, Jan. 2017.
- 459 [6] P. Dey, V. Panga, and S. Raghunathan, “A Cytokine Signalling Network for the Regulation  
460 of Inducible Nitric Oxide Synthase Expression in Rheumatoid Arthritis,” *PloS One*, vol. 11,  
461 no. 9, p. e0161306, 2016.
- 462 [7] J. M. Lambert, E. F. Lopez, and M. L. Lindsey, “Macrophage Roles Following Myocardial  
463 Infarction,” *Int. J. Cardiol.*, vol. 130, no. 2, pp. 147–158, Nov. 2008.
- 464 [8] S. Frantz and M. Nahrendorf, “Cardiac macrophages and their role in ischaemic heart  
465 disease,” *Cardiovasc. Res.*, vol. 102, no. 2, pp. 240–248, May 2014.
- 466 [9] T. Weinberger and C. Schulz, “Myocardial infarction: a critical role of macrophages in  
467 cardiac remodeling,” *Front. Physiol.*, vol. 6, Apr. 2015.
- 468 [10] D. P. Jones, H. D. True, and J. Patel, “Leukocyte Trafficking in Cardiovascular Disease:  
469 Insights from Experimental Models,” *Mediators Inflamm.*, vol. 2017, p. 9746169, 2017.
- 470 [11] N. Suthahar, W. C. Meijers, H. H. W. Silljé, and R. A. de Boer, “From Inflammation to  
471 Fibrosis-Molecular and Cellular Mechanisms of Myocardial Tissue Remodelling and  
472 Perspectives on Differential Treatment Opportunities,” *Curr. Heart Fail. Rep.*, vol. 14, no.  
473 4, pp. 235–250, Aug. 2017.
- 474 [12] S. Gordon and F. O. Martinez, “Alternative activation of macrophages: mechanism and  
475 functions,” *Immunity*, vol. 32, no. 5, pp. 593–604, May 2010.
- 476 [13] Y.-C. Liu, X.-B. Zou, Y.-F. Chai, and Y.-M. Yao, “Macrophage polarization in  
477 inflammatory diseases,” *Int. J. Biol. Sci.*, vol. 10, no. 5, pp. 520–529, 2014.
- 478 [14] F. O. Martinez, S. Gordon, M. Locati, and A. Mantovani, “Transcriptional profiling of the  
479 human monocyte-to-macrophage differentiation and polarization: new molecules and  
480 patterns of gene expression,” *J. Immunol. Baltim. Md 1950*, vol. 177, no. 10, pp. 7303–  
481 7311, Nov. 2006.
- 482 [15] I. Malyshev and Y. Malyshev, “Current Concept and Update of the Macrophage Plasticity  
483 Concept: Intracellular Mechanisms of Reprogramming and M3 Macrophage ‘Switch’  
484 Phenotype,” *BioMed Res. Int.*, vol. 2015, p. 341308, 2015.
- 485 [16] K. Y. DeLeon-Pennell *et al.*, “Periodontal-induced chronic inflammation triggers  
486 macrophage secretion of Ccl12 to inhibit fibroblast-mediated cardiac wound healing,” *JCI*  
487 *Insight*, vol. 2, no. 18, 21 2017.
- 488 [17] M. L. Lindsey *et al.*, “Exogenous CXCL4 infusion inhibits macrophage phagocytosis by  
489 limiting CD36 signalling to enhance post-myocardial infarction cardiac dilation and  
490 mortality,” *Cardiovasc. Res.*, vol. 115, no. 2, pp. 395–408, Feb. 2019.
- 491 [18] D. Gosselin *et al.*, “Environment Drives Selection and Function of Enhancers Controlling  
492 Tissue-Specific Macrophage Identities,” *Cell*, vol. 159, no. 6, pp. 1327–1340, Dec. 2014.
- 493 [19] A. J. Mouton *et al.*, “Mapping macrophage polarization over the myocardial infarction time  
494 continuum,” *Basic Res. Cardiol.*, vol. 113, no. 4, p. 26, 04 2018.
- 495 [20] F. O. Martinez and S. Gordon, “The M1 and M2 paradigm of macrophage activation: time  
496 for reassessment,” *F1000prime Rep.*, vol. 6, p. 13, 2014.
- 497 [21] M. Nahrendorf and F. K. Swirski, “Abandoning M1/M2 for a Network Model of  
498 Macrophage Function,” *Circ. Res.*, vol. 119, no. 3, pp. 414–417, Jul. 2016.
- 499 [22] Y. Ma, A. J. Mouton, and M. L. Lindsey, “Cardiac macrophage biology in the steady-state  
500 heart, the aging heart, and following myocardial infarction,” *Transl. Res. J. Lab. Clin.*  
501 *Med.*, vol. 191, pp. 15–28, Jan. 2018.

- 502 [23] R. Medzhitov and T. Horng, “Transcriptional control of the inflammatory response,” *Nat.*  
503 *Rev. Immunol.*, vol. 9, no. 10, pp. 692–703, Oct. 2009.
- 504 [24] J. Xue *et al.*, “Transcriptome-based network analysis reveals a spectrum model of human  
505 macrophage activation,” *Immunity*, vol. 40, no. 2, pp. 274–288, Feb. 2014.
- 506 [25] O. Ghasemi, Y. Ma, M. Lindsey, and Y.-F. Jin, “Using systems biology approaches to  
507 understand cardiac inflammation and extracellular matrix remodeling in the setting of  
508 myocardial infarction,” *WIREs Syst Biol Med*, p. n/a-n/a, Nov. 2013.
- 509 [26] M. L. Lindsey, J. J. Saucerman, and K. Y. DeLeon-Pennell, “Knowledge gaps to  
510 understanding cardiac macrophage polarization following myocardial infarction,” *Biochim.*  
511 *Biophys. Acta*, vol. 1862, no. 12, pp. 2288–2292, 2016.
- 512 [27] K. A. Ryall, D. O. Holland, K. A. Delaney, M. J. Kraeutler, A. J. Parker, and J. J.  
513 Saucerman, “Network reconstruction and systems analysis of cardiac myocyte hypertrophy  
514 signaling,” *J. Biol. Chem.*, vol. 287, no. 50, pp. 42259–42268, Dec. 2012.
- 515 [28] K. A. Ryall, V. J. Bezzerides, A. Rosenzweig, and J. J. Saucerman, “Phenotypic screen  
516 quantifying differential regulation of cardiac myocyte hypertrophy identifies CITED4  
517 regulation of myocyte elongation,” *J. Mol. Cell. Cardiol.*, vol. 72, pp. 74–84, Jul. 2014.
- 518 [29] J. H. Yang and J. J. Saucerman, “Computational Models Reduce Complexity and  
519 Accelerate Insight Into Cardiac Signaling Networks,” *Circ. Res.*, vol. 108, no. 1, pp. 85–97,  
520 Jan. 2011.
- 521 [30] D. Zhou *et al.*, “Macrophage polarization and function with emphasis on the evolving roles  
522 of coordinated regulation of cellular signaling pathways,” *Cell. Signal.*, vol. 26, no. 2, pp.  
523 192–197, Feb. 2014.
- 524 [31] T. Lawrence and G. Natoli, “Transcriptional regulation of macrophage polarization:  
525 enabling diversity with identity,” *Nat. Rev. Immunol.*, vol. 11, no. 11, pp. 750–761, Oct.  
526 2011.
- 527 [32] J. Rex *et al.*, “Model-Based Characterization of Inflammatory Gene Expression Patterns of  
528 Activated Macrophages,” *PLoS Comput. Biol.*, vol. 12, no. 7, p. e1005018, Jul. 2016.
- 529 [33] R. Medzhitov and T. Horng, “Transcriptional control of the inflammatory response,” *Nat.*  
530 *Rev. Immunol.*, vol. 9, no. 10, pp. 692–703, Oct. 2009.
- 531 [34] Y. Ma *et al.*, “Matrix metalloproteinase-28 deletion exacerbates cardiac dysfunction and  
532 rupture after myocardial infarction in mice by inhibiting M2 macrophage activation,” *Circ.*  
533 *Res.*, vol. 112, no. 4, pp. 675–688, Feb. 2013.
- 534 [35] M. J. Kraeutler, A. R. Soltis, and J. J. Saucerman, “Modeling cardiac  $\beta$ -adrenergic signaling  
535 with normalized-Hill differential equations: comparison with a biochemical model,” *BMC*  
536 *Syst. Biol.*, vol. 4, p. 157, Nov. 2010.
- 537 [36] J. H. Yang and J. J. Saucerman, “Computational models reduce complexity and accelerate  
538 insight into cardiac signaling networks,” *Circ. Res.*, vol. 108, no. 1, pp. 85–97, Jan. 2011.
- 539 [37] A. C. Zeigler, W. J. Richardson, J. W. Holmes, and J. J. Saucerman, “Computational  
540 modeling of cardiac fibroblasts and fibrosis,” *J. Mol. Cell. Cardiol.*, vol. 93, pp. 73–83,  
541 Apr. 2016.
- 542 [38] A. Mantovani, A. Sica, S. Sozzani, P. Allavena, A. Vecchi, and M. Locati, “The chemokine  
543 system in diverse forms of macrophage activation and polarization,” *Trends Immunol.*, vol.  
544 25, no. 12, pp. 677–686, Dec. 2004.
- 545 [39] P. J. Murray *et al.*, “Macrophage activation and polarization: nomenclature and  
546 experimental guidelines,” *Immunity*, vol. 41, no. 1, pp. 14–20, Jul. 2014.

- 547 [40] V. Piccolo *et al.*, “Opposing macrophage polarization programs show extensive epigenomic  
548 and transcriptional cross-talk,” *Nat. Immunol.*, vol. 18, no. 5, pp. 530–540, May 2017.
- 549 [41] T. D. Smith, M. J. Tse, E. L. Read, and W. F. Liu, “Regulation of macrophage polarization  
550 and plasticity by complex activation signals,” *Integr. Biol. Quant. Biosci. Nano Macro*, vol.  
551 8, no. 9, pp. 946–955, 12 2016.
- 552 [42] E. Vergadi, E. Ieronymaki, K. Lyroni, K. Vaporidi, and C. Tsatsanis, “Akt Signaling  
553 Pathway in Macrophage Activation and M1/M2 Polarization,” *J. Immunol.*, vol. 198, no. 3,  
554 pp. 1006–1014, Feb. 2017.
- 555 [43] C. S. Cheng, M. S. Behar, G. W. Suryawanshi, K. E. Feldman, R. Spreafico, and A.  
556 Hoffmann, “Iterative Modeling Reveals Evidence of Sequential Transcriptional Control  
557 Mechanisms,” *Cell Syst.*, vol. 4, no. 3, pp. 330–343.e5, Mar. 2017.
- 558 [44] H. Qin, C. A. Wilson, S. J. Lee, and E. N. Benveniste, “IFN-beta-induced SOCS-1  
559 negatively regulates CD40 gene expression in macrophages and microglia,” *FASEB J. Off.*  
560 *Publ. Fed. Am. Soc. Exp. Biol.*, vol. 20, no. 7, pp. 985–987, May 2006.
- 561 [45] V. Toshchakov *et al.*, “TLR4, but not TLR2, mediates IFN-beta-induced STAT1alpha/beta-  
562 dependent gene expression in macrophages,” *Nat. Immunol.*, vol. 3, no. 4, pp. 392–398,  
563 Apr. 2002.
- 564 [46] H. Kuwata *et al.*, “IL-10-inducible Bcl-3 negatively regulates LPS-induced TNF-alpha  
565 production in macrophages,” *Blood*, vol. 102, no. 12, pp. 4123–4129, Dec. 2003.
- 566 [47] Y. P. Zhu, J. R. Brown, D. Sag, L. Zhang, and J. Suttles, “Adenosine 5’-monophosphate-  
567 activated protein kinase regulates IL-10-mediated anti-inflammatory signaling pathways in  
568 macrophages,” *J. Immunol. Baltim. Md 1950*, vol. 194, no. 2, pp. 584–594, Jan. 2015.
- 569 [48] X. Hu, J. Chen, L. Wang, and L. B. Ivashkiv, “Crosstalk among Jak-STAT, Toll-like  
570 receptor, and ITAM-dependent pathways in macrophage activation,” *J. Leukoc. Biol.*, vol.  
571 82, no. 2, pp. 237–243, Aug. 2007.
- 572 [49] D. Fairweather *et al.*, “IL-12 protects against coxsackievirus B3-induced myocarditis by  
573 increasing IFN-gamma and macrophage and neutrophil populations in the heart,” *J.*  
574 *Immunol. Baltim. Md 1950*, vol. 174, no. 1, pp. 261–269, Jan. 2005.
- 575 [50] A. Yoshimura, T. Naka, and M. Kubo, “SOCS proteins, cytokine signalling and immune  
576 regulation,” *Nat. Rev. Immunol.*, vol. 7, no. 6, pp. 454–465, Jun. 2007.
- 577 [51] C. M. Prêle, E. A. Woodward, J. Bisley, A. Keith-Magee, S. E. Nicholson, and P. H. Hart,  
578 “SOCS1 regulates the IFN but not NFkappaB pathway in TLR-stimulated human  
579 monocytes and macrophages,” *J. Immunol. Baltim. Md 1950*, vol. 181, no. 11, pp. 8018–  
580 8026, Dec. 2008.
- 581 [52] U. Lehmann *et al.*, “SHP2 and SOCS3 contribute to Tyr-759-dependent attenuation of  
582 interleukin-6 signaling through gp130,” *J. Biol. Chem.*, vol. 278, no. 1, pp. 661–671, Jan.  
583 2003.
- 584 [53] E. Beurel and R. S. Jope, “Differential regulation of STAT family members by glycogen  
585 synthase kinase-3,” *J. Biol. Chem.*, vol. 283, no. 32, pp. 21934–21944, Aug. 2008.
- 586 [54] M. Martin, K. Rehani, R. S. Jope, and S. M. Michalek, “Toll-like receptor-mediated  
587 cytokine production is differentially regulated by glycogen synthase kinase 3,” *Nat.*  
588 *Immunol.*, vol. 6, no. 8, pp. 777–784, Aug. 2005.
- 589 [55] Q. Du *et al.*, “Porcine circovirus type 2 activates PI3K/Akt and p38 MAPK pathways to  
590 promote interleukin-10 production in macrophages via Cap interaction of gC1qR,”  
591 *Oncotarget*, vol. 7, no. 14, pp. 17492–17507, Apr. 2016.

- 592 [56] M. J. Kraeutler, A. R. Soltis, and J. J. Saucerman, “Modeling cardiac  $\beta$ -adrenergic signaling  
593 with normalized-Hill differential equations: comparison with a biochemical model,” *BMC*  
594 *Syst. Biol.*, vol. 4, p. 157, Nov. 2010.
- 595 [57] S. L. Werner, D. Barken, and A. Hoffmann, “Stimulus specificity of gene expression  
596 programs determined by temporal control of IKK activity,” *Science*, vol. 309, no. 5742, pp.  
597 1857–1861, Sep. 2005.
- 598 [58] V. F.-S. Shih, J. D. Kearns, S. Basak, O. V. Savinova, G. Ghosh, and A. Hoffmann,  
599 “Kinetic control of negative feedback regulators of NF-kappaB/RelA determines their  
600 pathogen- and cytokine-receptor signaling specificity,” *Proc. Natl. Acad. Sci. U. S. A.*, vol.  
601 106, no. 24, pp. 9619–9624, Jun. 2009.
- 602 [59] M. Fallahi-Sichani, M. El-Kebir, S. Marino, D. E. Kirschner, and J. J. Linderman,  
603 “Multiscale computational modeling reveals a critical role for TNF- $\alpha$  receptor 1 dynamics  
604 in tuberculosis granuloma formation,” *J. Immunol. Baltim. Md 1950*, vol. 186, no. 6, pp.  
605 3472–3483, Mar. 2011.
- 606 [60] A. B. Caldwell, Z. Cheng, J. D. Vargas, H. A. Birnbaum, and A. Hoffmann, “Network  
607 dynamics determine the autocrine and paracrine signaling functions of TNF,” *Genes Dev.*,  
608 vol. 28, no. 19, pp. 2120–2133, Oct. 2014.
- 609 [61] Y. Ma *et al.*, “Matrix Metalloproteinase-28 Deletion Exacerbates Cardiac Dysfunction and  
610 Rupture Following Myocardial Infarction in Mice by Inhibiting M2 Macrophage  
611 Activation,” *Circ. Res.*, vol. 112, no. 4, pp. 675–688, Feb. 2013.
- 612 [62] R. Zamilpa *et al.*, “Transgenic overexpression of matrix metalloproteinase-9 in  
613 macrophages attenuates the inflammatory response and improves left ventricular function  
614 post-myocardial infarction,” *J. Mol. Cell. Cardiol.*, vol. 53, no. 5, pp. 599–608, Nov. 2012.
- 615 [63] C. A. Meschiari *et al.*, “Macrophage overexpression of matrix metalloproteinase-9 in aged  
616 mice improves diastolic physiology and cardiac wound healing after myocardial  
617 infarction,” *Am. J. Physiol. Heart Circ. Physiol.*, vol. 314, no. 2, pp. H224–H235, 01 2018.
- 618 [64] M. Jung *et al.*, “IL-10 improves cardiac remodeling after myocardial infarction by  
619 stimulating M2 macrophage polarization and fibroblast activation,” *Basic Res. Cardiol.*,  
620 vol. 112, no. 3, p. 33, 2017.
- 621 [65] A. Dobin *et al.*, “STAR: ultrafast universal RNA-seq aligner,” *Bioinforma. Oxf. Engl.*, vol.  
622 29, no. 1, pp. 15–21, Jan. 2013.
- 623 [66] M. I. Love, W. Huber, and S. Anders, “Moderated estimation of fold change and dispersion  
624 for RNA-seq data with DESeq2,” *Genome Biol.*, vol. 15, no. 12, 2014.
- 625 [67] M. V. Kuleshov *et al.*, “Enrichr: a comprehensive gene set enrichment analysis web server  
626 2016 update,” *Nucleic Acids Res.*, vol. 44, no. W1, pp. W90–97, 08 2016.
- 627  
628

629 **Tables**

630

631 **Table 1.** Clusters of network responses to single and paired cytokine stimuli.

| Stimulus Cluster  | Stimulus Conditions                                                                                                                                                                                                                                                                                                      |
|-------------------|--------------------------------------------------------------------------------------------------------------------------------------------------------------------------------------------------------------------------------------------------------------------------------------------------------------------------|
| TNF $\alpha$ /IFN | <i>Single:</i> IFN $\gamma$ , IFN $\beta$ , TNF $\alpha$<br><i>Pairs:</i> IFN $\gamma$ +IFN $\beta$ , IFN $\gamma$ +TNF $\alpha$ , IFN $\gamma$ +IL10, IFN $\gamma$ +IL12, IFN $\beta$ +TNF $\alpha$ , IFN $\beta$ +IL6, IFN $\beta$ +IL10, IFN $\beta$ +IL12, TNF $\alpha$ +IL6, TNF $\alpha$ +IL10, TNF $\alpha$ +IL12 |
| Ctrl              | <i>Single:</i> control, IL6, IL10, IL12<br><i>Pairs:</i> IFN $\gamma$ +IL6, IL6+IL10, IL6+IL12, IL10+IL12                                                                                                                                                                                                                |
| Anti-pairs        | <i>Pairs:</i> LPS+IL4, IFN $\gamma$ +IL4, IFN $\beta$ +IL4, TNF $\alpha$ +IL4                                                                                                                                                                                                                                            |
| IL4               | <i>Single:</i> IL4<br><i>Pairs:</i> IL1+IL4, IL4+IL6, IL4+IL10, IL4+IL12                                                                                                                                                                                                                                                 |
| IL1               | <i>Single:</i> IL1<br><i>Pairs:</i> IFN $\gamma$ +IL1, IFN $\beta$ +IL1, TNF $\alpha$ +IL1, IL1+IL6, IL1+IL10, IL1+IL12                                                                                                                                                                                                  |
| LPS               | <i>Single:</i> LPS<br><i>Pairs:</i> LPS+IFN $\gamma$ , LPS+IFN $\beta$ , LPS+TNF $\alpha$ , LPS+IL1, LPS+IL6, LPS+IL10, LPS+IL12                                                                                                                                                                                         |

632

633 **Figure Legends**

634

635 **Figure 1. Network model of the peritoneal macrophage signaling network.** Each of  
636 node represents a protein (rectangle), mRNA (hexagon), or small molecule (ellipse) in  
637 the network model. Each arrow indicates an activating (pointed arrow) or inhibiting  
638 (flathead arrow) reaction. Purple arrows highlight feedback reactions. Reactions  
639 involving multiple reactants were combined via AND logic gate (circled box). Multiple  
640 reactions affecting the same product were combined using OR gate logic. To simplify  
641 visualization, the translated nodes were overlapped under the corresponding signaling  
642 node (e.g. translated IL1 node covered by IL1 protein).

643

644 **Figure 2. Distinct network dynamics predicted in response to LPS+IFN $\gamma$  and IL4.**

645 A) Dynamics of predicted gene expression in response to stimulation with LPS+IFN $\gamma$  or  
646 IL4. Stimuli were added at 0 h. B) Kinetics of selected mRNAs in response to  
647 stimulation with LPS+IFN $\gamma$  or IL4. C) mRNA expression profiles predicted by the model,  
648 validated against RNA-Seq measurements from peritoneal macrophages treated with  
649 LPS+IFN $\gamma$  or IL4 for 4h. For semi-quantitative comparison between model and  
650 experiment, the log<sub>2</sub> fold change of each mRNA vs. control was normalized by the root  
651 mean square between the M1 and M2 conditions. Classic M1 (orange) and M2 (green)  
652 phenotype markers are highlighted.

653

654 **Figure 3. Network-wide knockdown simulations predict distinct mechanistic  
655 drivers of macrophage activation with pro- and anti-inflammatory stimuli.** A)

656 Overall network influence of node knockdowns under stimulation with either LPS+IFN $\gamma$   
657 (orange) or IL4 (green). Nodes were ranked by the overall influence of their knockdown  
658 on all other network nodes, under conditions of LPS+IFN $\gamma$  stimulation. B) Predicted

659 effect of knockdown of influential nodes on activity of highly sensitive nodes, under  
660 conditions of LPS+IFN $\gamma$  or IL4 treatment.

661

662 **Figure 4. Distinct macrophage activation states induced by combined stimuli.** A)  
663 Network-wide response to 9 single input stimuli, 36 pairwise combinations, and negative  
664 control conditions at 4 h. Hierarchical clustering was performed to identify six  
665 phenotype clusters (color coded rows) and signaling modules (column dendrogram). B)  
666 Principal component analysis (PCA) scores reveal relationships between the six  
667 phenotype clusters induced by combined stimuli. C) PCA loadings indicate the  
668 contribution of each node's activity to the PC1 and PC2 dimensions. M1-associated  
669 (orange) and M2-associated (green) labels indicate representative signaling modules  
670 within the quadrants.

671

672 **Figure 5. Macrophage network model predicts both mutual inhibition and mutual**  
673 **activation in response to conflicting cues.** A) Model-predicted signaling module  
674 activities in response to IFN $\gamma$  and IL4 treatments at 4h, column normalized. B)  
675 Experimental validation of mRNA expression predicted in response to IFN $\gamma$ , IL4, or  
676 IFN $\gamma$ +IL4. For both experimental data [40] and model predictions, mRNA were  
677 independently normalized by RMS-normalized log2 fold change at 4 h. C) Predicted  
678 expression dynamics of selected mRNAs in response to IFN $\gamma$ , IL4, or IFN $\gamma$ +IL4. D)  
679 Context-dependent network response to node knockdowns under treatments of IFN $\gamma$ ,  
680 IL4, or IFN $\gamma$ +IL4.

681

682 **Figure 6. Illustrative roadmap of macrophage activation phenotypes and**  
683 **signaling modules induced by combinations of stimuli.** Combinations of pro- and  
684 anti-inflammatory stimuli induced a distinct mixed phenotype associated with mutual  
685 activation of PI3K and STAT3 modules yet mutual inhibition of M1- and M2- associated  
686 markers.



# Extracellular

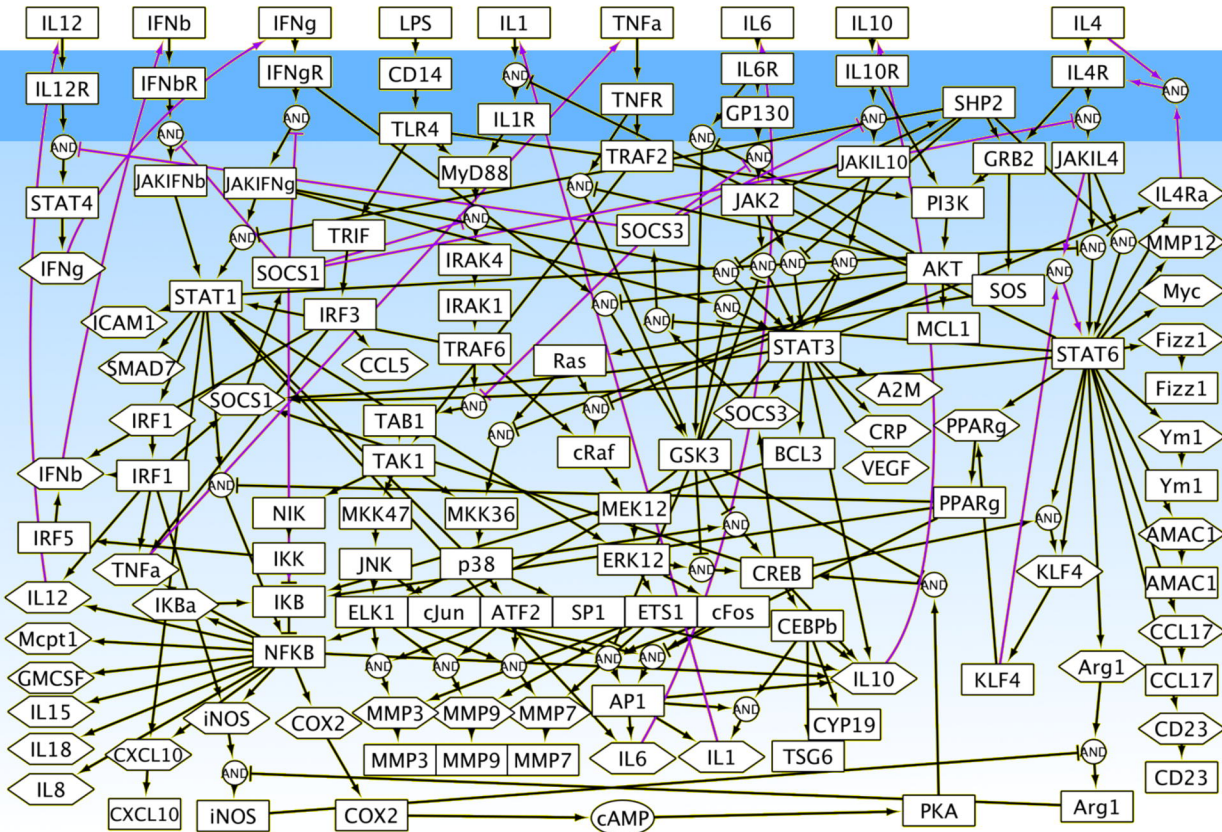

# Intracellular

□ Proteins    ⬡ mRNAs    ○ Small Molecules    ⬢ Logic Gates

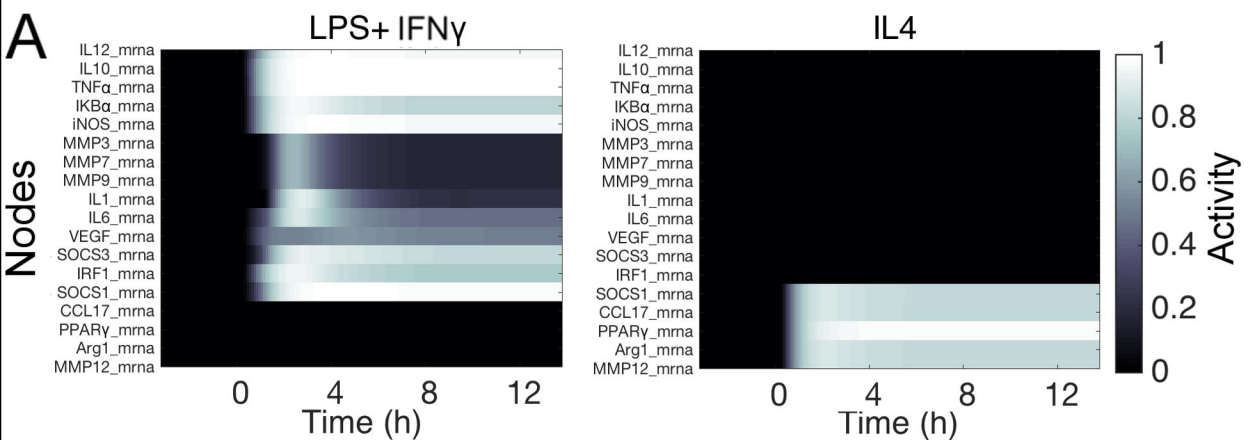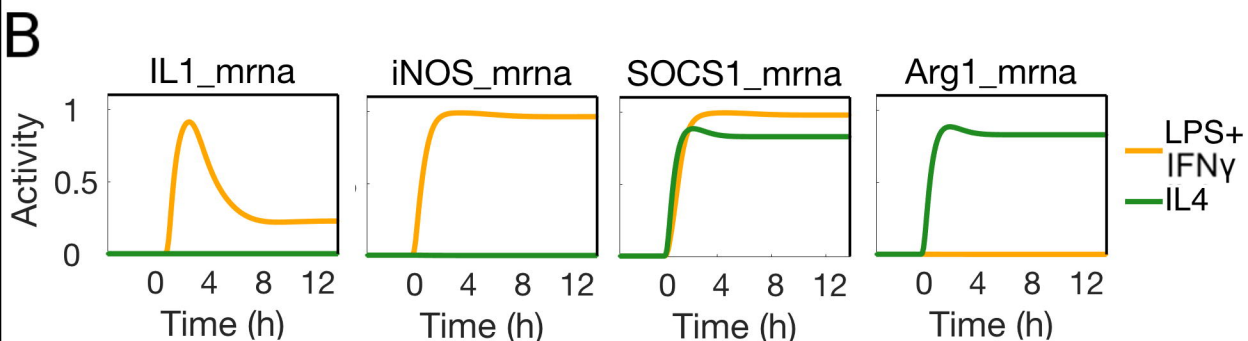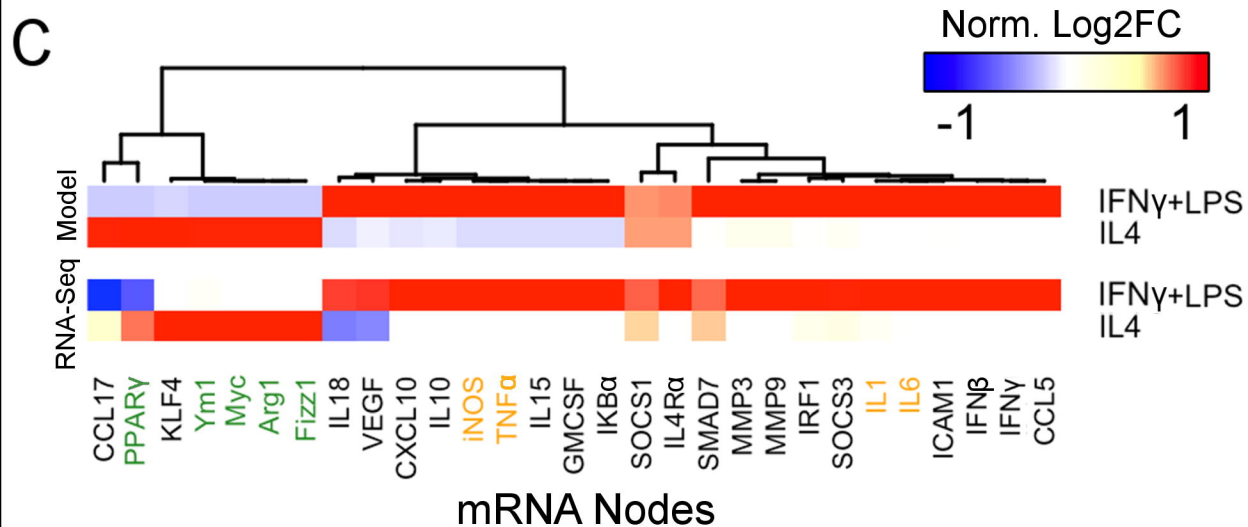

**A**Normalized Node  
Influence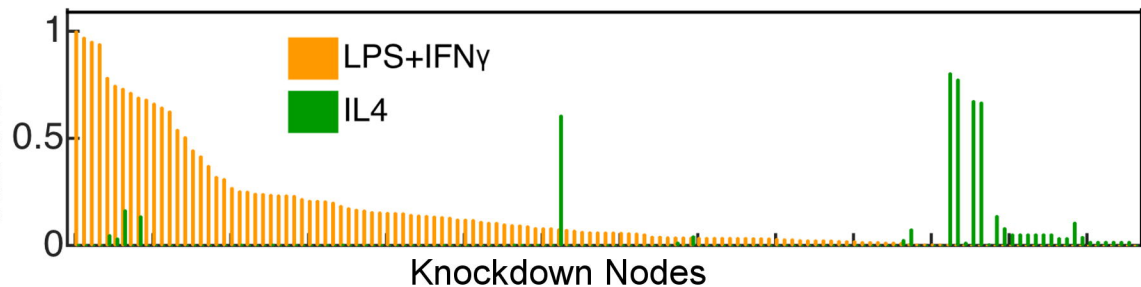**B**

Most Sensitive Nodes

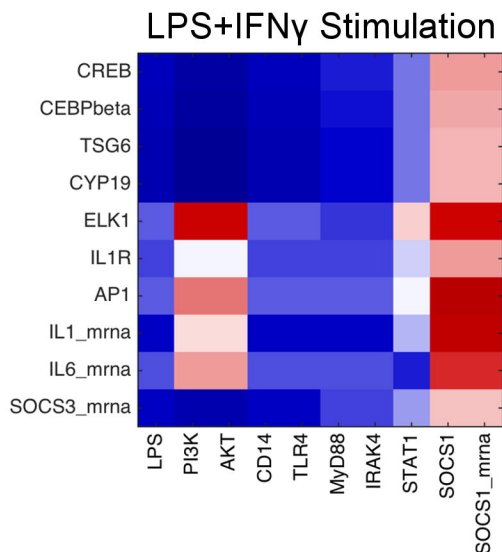

Knockdown of Most Influential Nodes

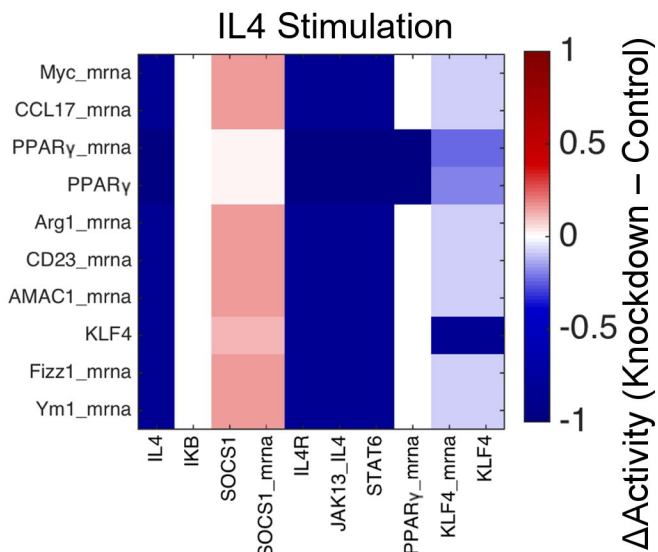

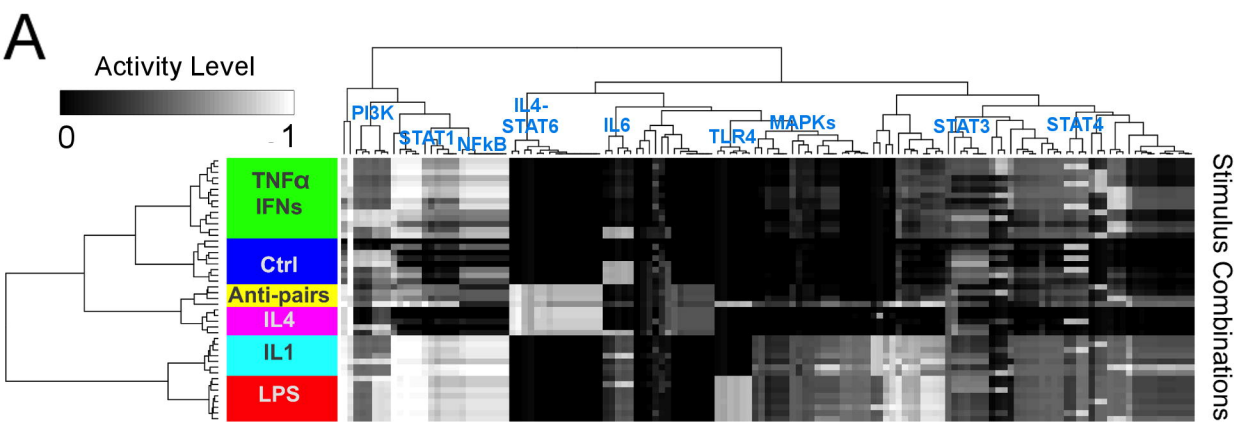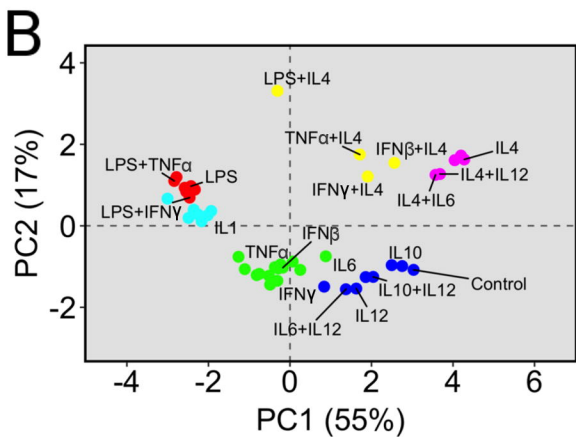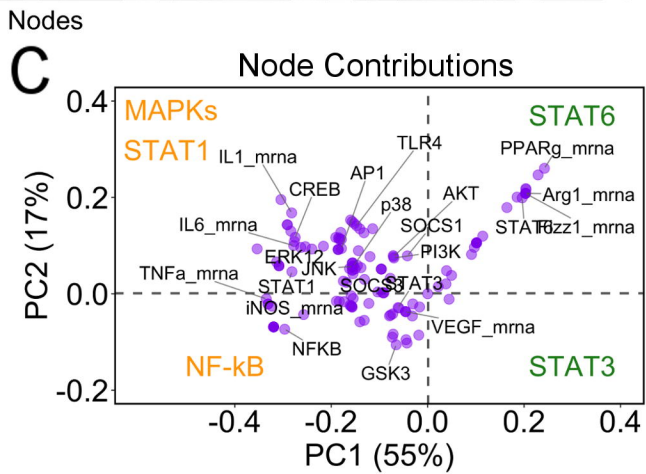

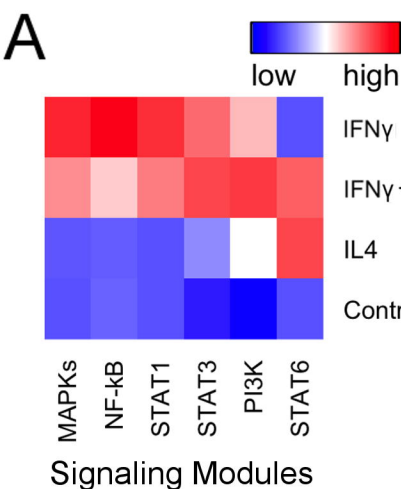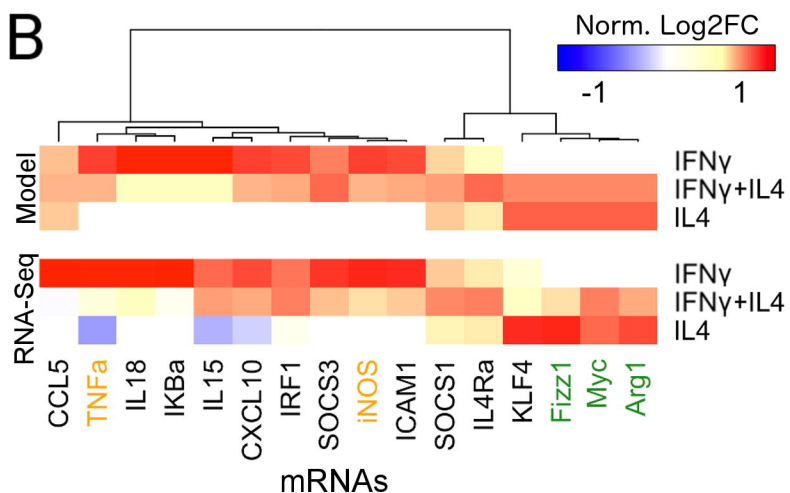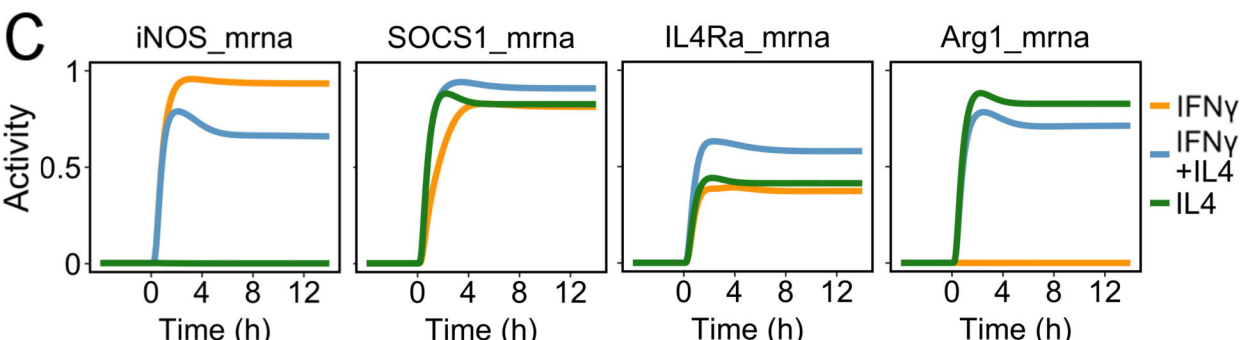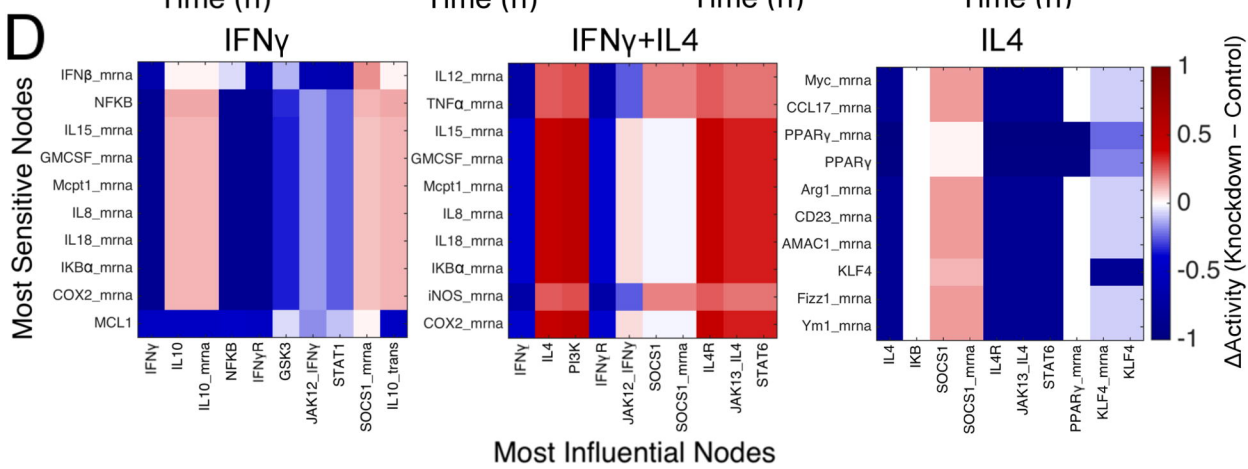

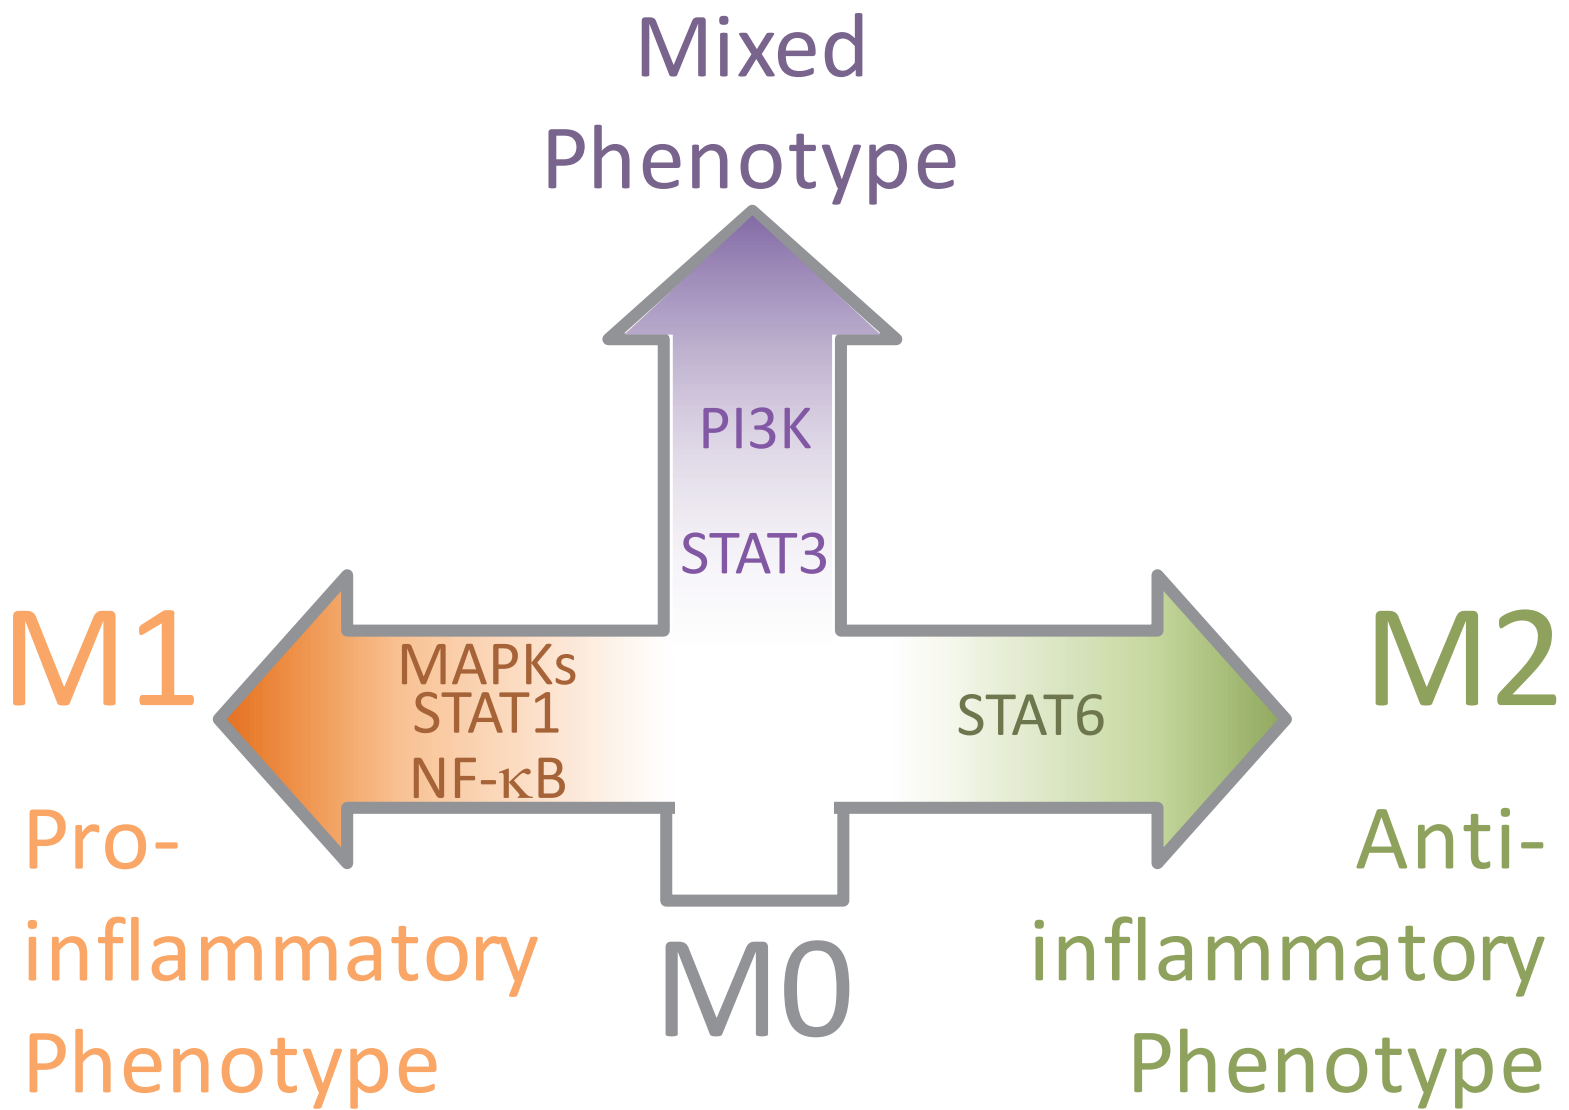

Source: https://www.biorxiv.org/content/10.1101/844464v1.full.pdf
